# Supplementary material for: Effects of Perilla Seed Meal on Productive Performance, Egg Quality, Antioxidant Capacity and Hepatic Lipid Metabolism of Wenchang Breeder Hens
Source: MDPI journal article supplement (doi:10.3390/ani13223587), 2023-11-20
Supplement: s1 [file s1]

## Supplementary Information

**Table S1.** The nutritive composition and active ingredients of PSM.

| Nutritive ingredients            | Content |
|----------------------------------|---------|
| Crude protein, %                 | 39.75   |
| Crude fat, %                     | 14.87   |
| Crude fiber, %                   | 26.98   |
| Ash, %                           | 5.83    |
| Essential amino acids, %         | 9.94    |
| Total amino acids, %             | 32.46   |
| Potassium, mg/kg                 | 9222.33 |
| Ferrous, mg/kg                   | 131.83  |
| <b>Fatty acid content of PSM</b> |         |
| C14:0                            | 45.9    |
| C15:0                            | 23.9    |
| C16:0                            | 11706.7 |
| C17:0                            | 39.5    |
| C18:0                            | 3083.3  |
| C20:0                            | 320.0   |
| C22:0                            | 75.7    |
| C24:0                            | 133.3   |
| SFA                              | 15428.3 |
| C16:1                            | 313.3   |
| C17:1                            | 21.2    |
| C18:1n9c                         | 21423.3 |
| MUFA                             | 21757.8 |
| C18:2n6c                         | 16843.3 |
| C20:2                            | 46.0    |
| C18:3n3                          | 63120.0 |
| PUFA                             | 80009.3 |
